# Supplementary material for: SARS-CoV-2 vaccination enhances the effector qualities of spike-specific T cells induced by COVID-19
Source: PubMed Central journal article supplement (PMC7615587; doi:10.1126/sciimmunol.adh0687), 2023-12-08
Supplement: EMS192724-supplement-Supplementary_Materials.pdf [file EMS192724-supplement-Supplementary_Materials.pdf]

686 **SUPPLEMENTARY MATERIALS**

687 Fig. S1. Detection of AIM<sup>+</sup> T cells.

688 Fig. S2. Effect of vaccination on the frequencies of spike-specific T cells.

689 Fig. S3. Characterization of T cell cytokine production and inhibitory receptor expression.

690 Fig. S4. Classification of AIM<sup>+</sup> T cell populations sorted for scRNA-seq.

691 Fig. S5. Protein expression among spike-specific T cells determined via CITE-seq.

692 Fig. S6. Transcriptomic comparison of spike-specific T cells before and after vaccination.

693 Fig. S7. Clonal characterization of spike-specific T cells before and after vaccination.

694 Fig. S8. Transcriptomic signatures of CD8<sup>+</sup> T cell clonotypes detected at one or both time points.

695 Fig. S9. Characterization of hybrid spike-specific T cell responses in donors with CLL.

696 Fig. S10. Summary of hybrid T cell immunity shaped by infection and vaccination.

697

698 Table S1. Summary of donors with a history of mild or severe COVID-19.

699 Table S2. Summary of donors selected for tetramer analysis.

700 Table S3. Summary of donors selected for scRNA-seq.

701 Table S4. Summary of donors with CLL.

702 Table S5. Summary of healthy vaccinated donors.

703 Table S6. Surface staining protocol for flow cytometry.

704 Table S7. Surface and intracellular staining protocol for flow cytometry.

705 Table S8. Tetramer, surface, and intracellular staining protocol for flow cytometry.

706 Table S9. Surface and oligo-conjugated antibody staining protocol for single-cell sorting and

707 CITE-seq.

708

709 Data file S1. Raw data file for main figures.

710 Data file S2. Raw data file for supplementary figures.

711 Data file S3. Lists of differentially expressed genes.

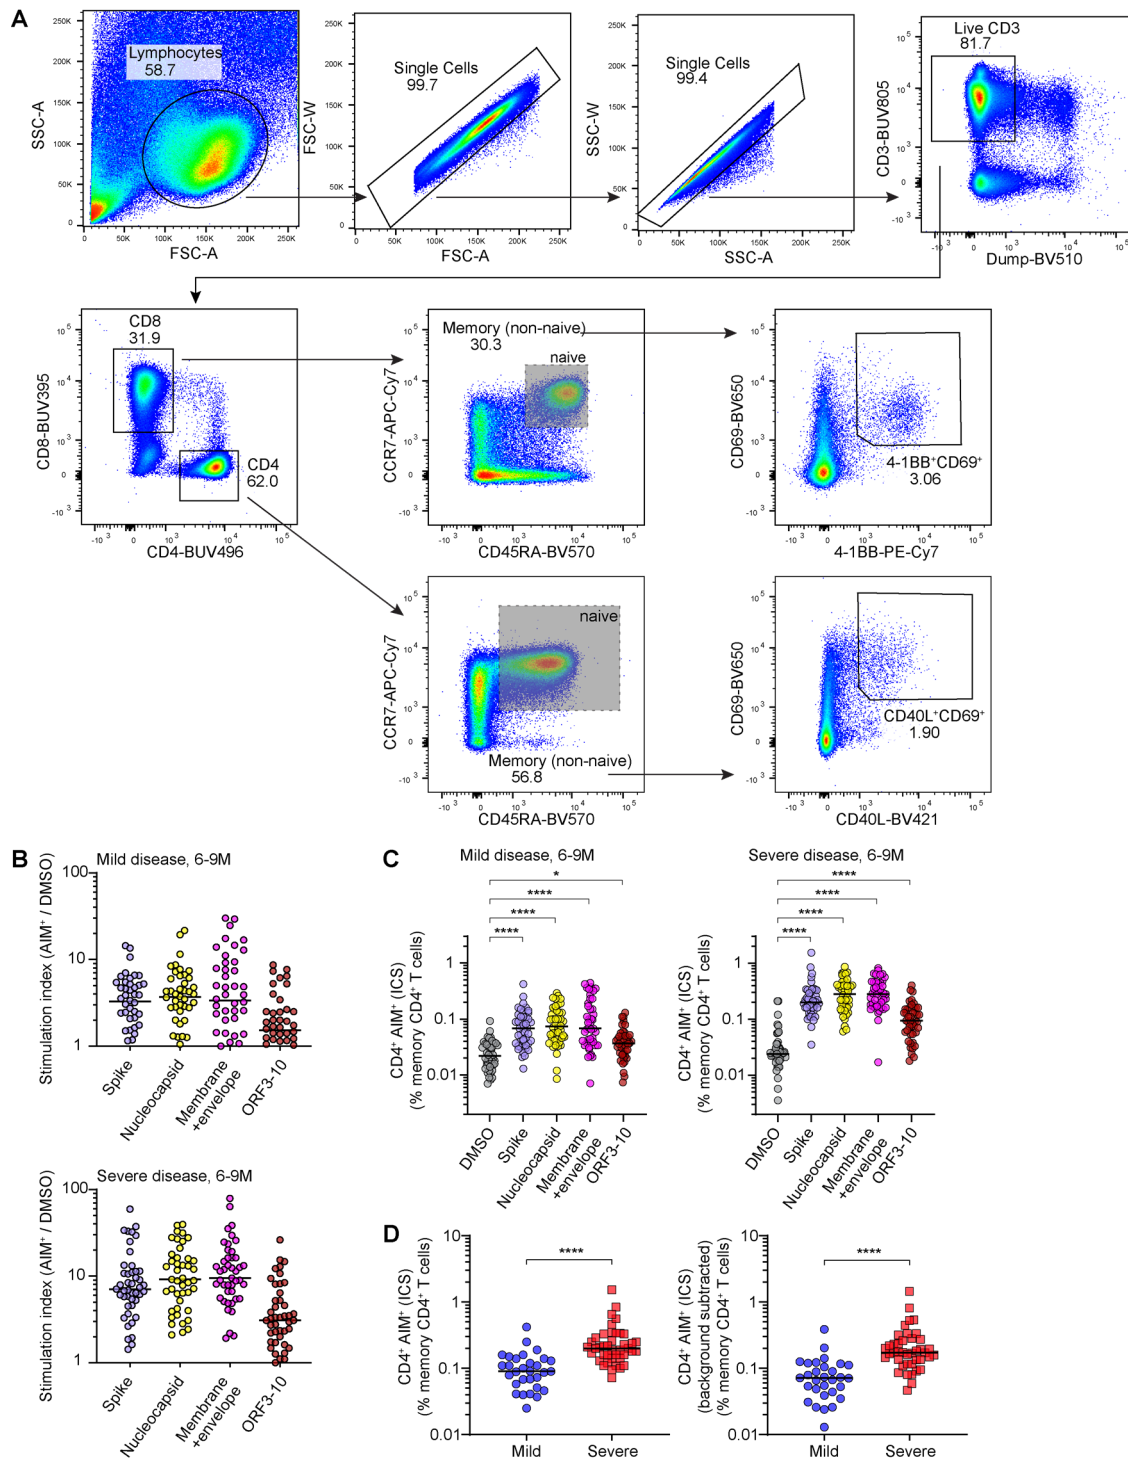

**Fig. S1. Detection of AIM<sup>+</sup> T cells.** (A) Representative flow cytometric gating strategy showing the identification of AIM<sup>+</sup> memory CD4<sup>+</sup> and CD8<sup>+</sup> T cells via flow cytometry. (B) Stimulation indices of individual donor responses at 6–9M. (C) Frequencies of intracellular AIM<sup>+</sup> memory CD4<sup>+</sup> T cells after DMSO and peptide pool stimulation. (D) Frequencies of AIM<sup>+</sup> memory CD4<sup>+</sup> T cells measured by intracellular staining, plotted with raw values (left) and DMSO background subtracted values (right). Statistical significance was determined by Mann–Whitney U test (C and D). \* $P < 0.05$ , \*\* $P < 0.01$ , \*\*\* $P < 0.001$ , \*\*\*\* $P < 0.0001$ . Bars shown median.

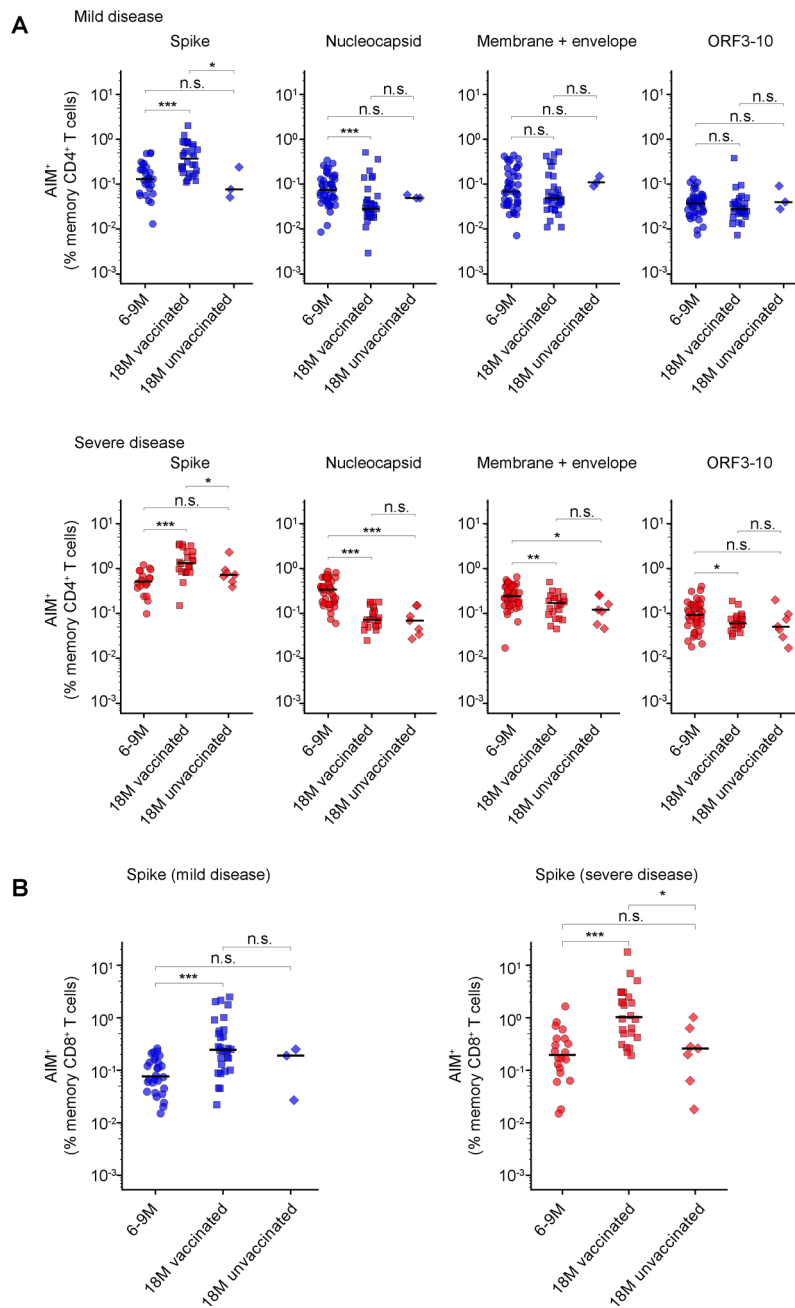

**Fig. S2. Effect of vaccination on the frequency of spike-specific T cells. (A)** Frequencies of AIM<sup>+</sup> memory CD4<sup>+</sup> T cells targeting different regions of SARS-CoV-2. **(B)** Frequencies of AIM<sup>+</sup> memory CD8<sup>+</sup> T cells targeting the spike protein of SARS-CoV-2. Statistical significance was determined by Mann–Whitney U test (A and B). n.s. =  $P > 0.05$ , \* $P < 0.05$ , \*\* $P < 0.01$ , \*\*\* $P < 0.001$ , \*\*\*\* $P < 0.0001$ . Bars shown median.

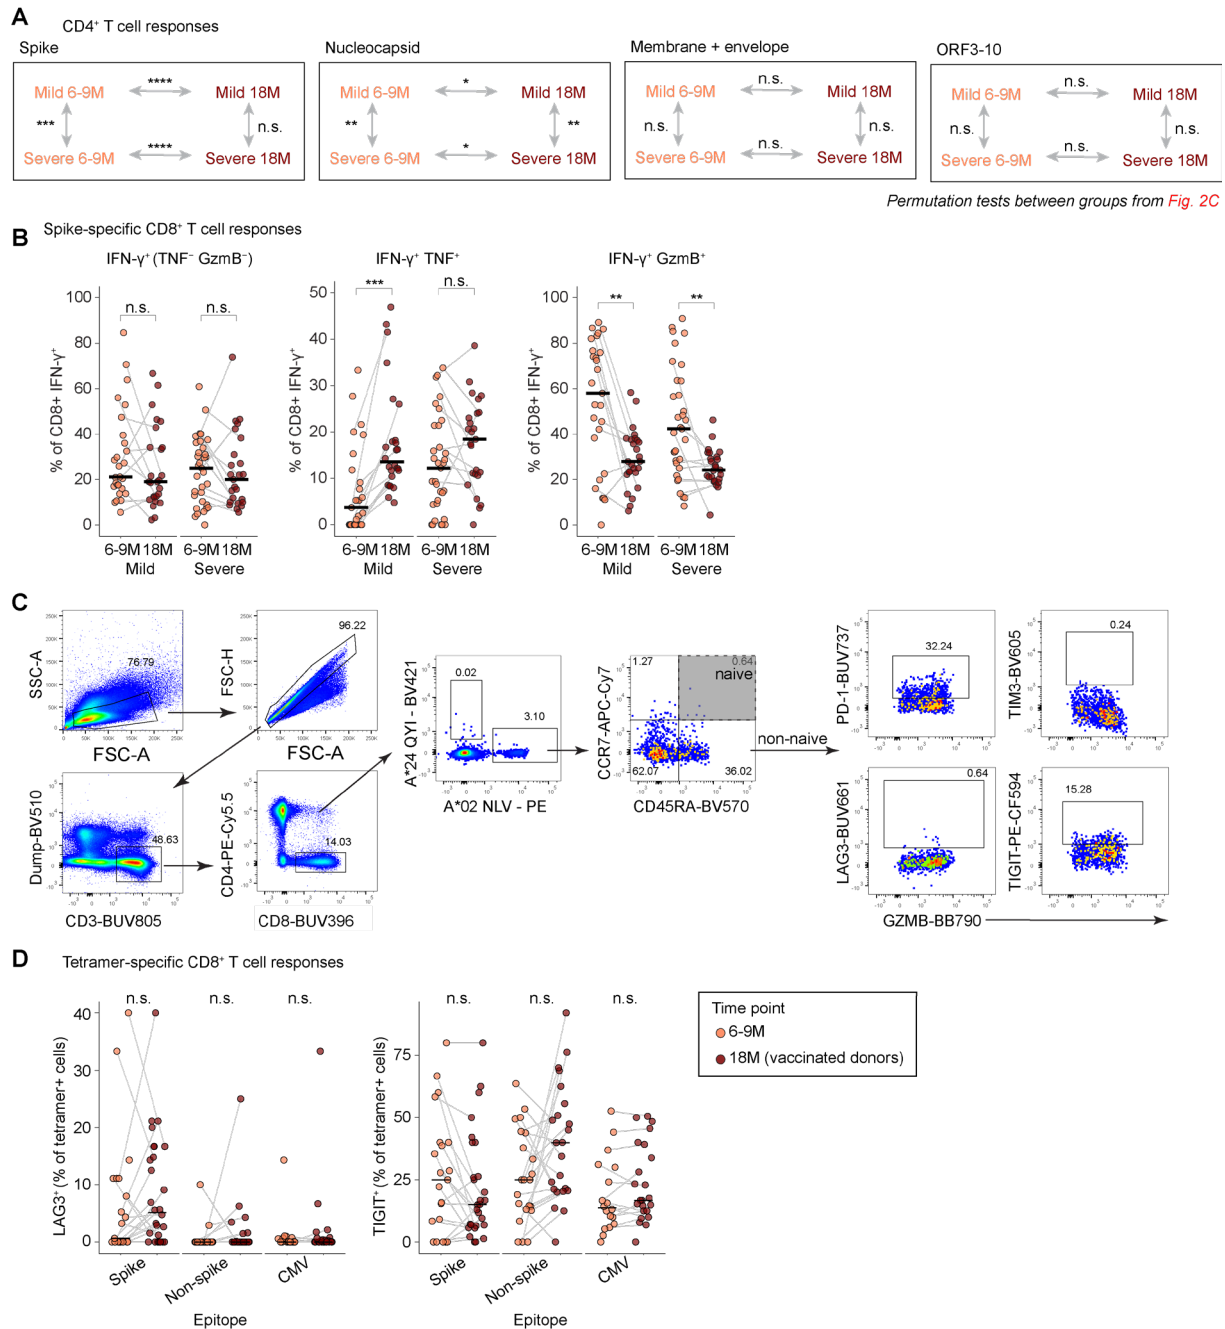

**Fig. S3. Characterization of T cell cytokine production and inhibitory receptor expression.** (A) Permutation test comparisons of cytokine expression profiles among AIM<sup>+</sup> memory CD4<sup>+</sup> T cells (related to Fig. 2C). (B) Percentages of IFN- $\gamma$ <sup>+</sup> spike-specific memory CD8<sup>+</sup> T cells with polyfunctional cytokine and cytotoxic molecule expression after peptide stimulation. (C) Representative flow cytometry plots showing the identification of inhibitory receptor expression among tetramer-binding CD8<sup>+</sup> T cells. (D) Percentages of tetramer-binding CD8<sup>+</sup> T cells with inhibitory receptor expression. Statistical significance was determined by permutation test (A) and Mann–Whitney U test (B and D). n.s. =  $P > 0.05$ , \* $P < 0.05$ , \*\* $P < 0.01$ , \*\*\* $P < 0.001$ , \*\*\*\* $P < 0.0001$ . Bars shown median.

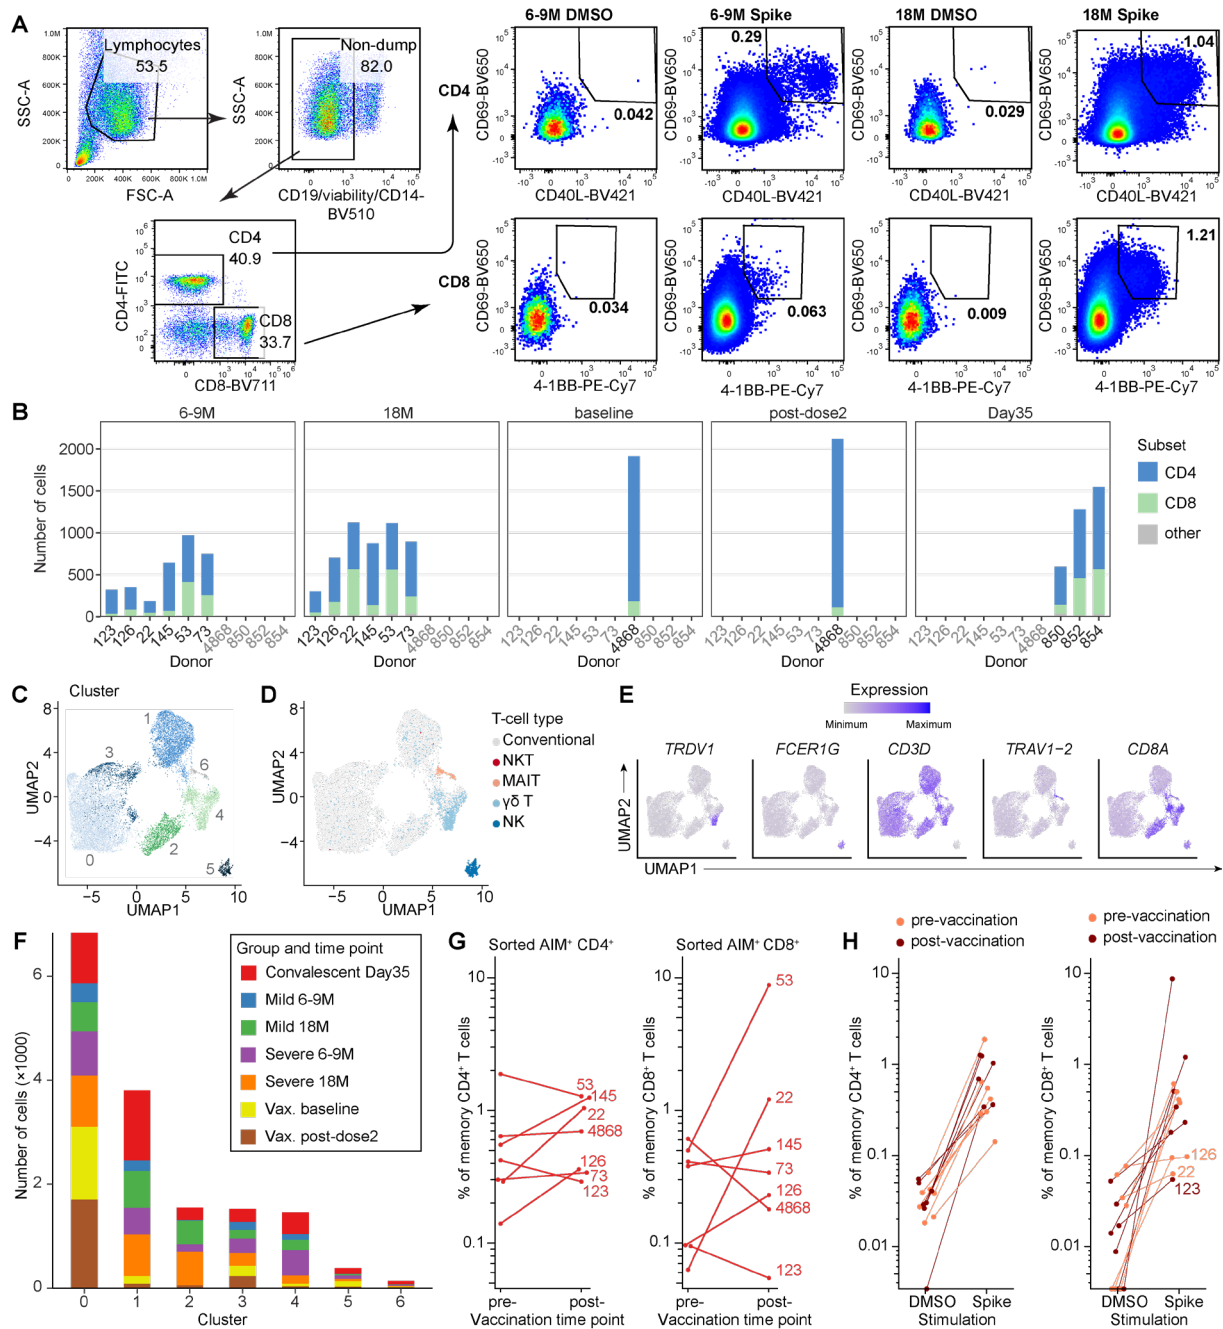

**Fig. S4. Classification of AIM<sup>+</sup> populations sorted for scRNA-seq.** (A) Representative flow cytometric gating strategy for the identification and sorting of AIM<sup>+</sup> CD4<sup>+</sup> and CD8<sup>+</sup> T cells for scRNA-seq. (B) Distribution of conventional AIM<sup>+</sup> cells with CD4 or CD8 protein expression separated by donor and time point. Cells classified as 'other' either lacked expression of CD4 and CD8 or expressed both CD4 and CD8. (C) UMAP and clustering of all sorted cells, including NK cells and unconventional T cells. (D) Classification of NK cells and unconventional T cells. (E) Expression of transcripts corresponding to conventional and unconventional T cell subsets. (F) Distribution of donor groups and time points across each UMAP cluster. (G) Frequencies of sorted AIM<sup>+</sup> memory CD4<sup>+</sup> and CD8<sup>+</sup> T cells after spike peptide pool stimulation. (H) Comparison of frequencies of AIM<sup>+</sup> populations after DMSO and spike peptide pool stimulation.

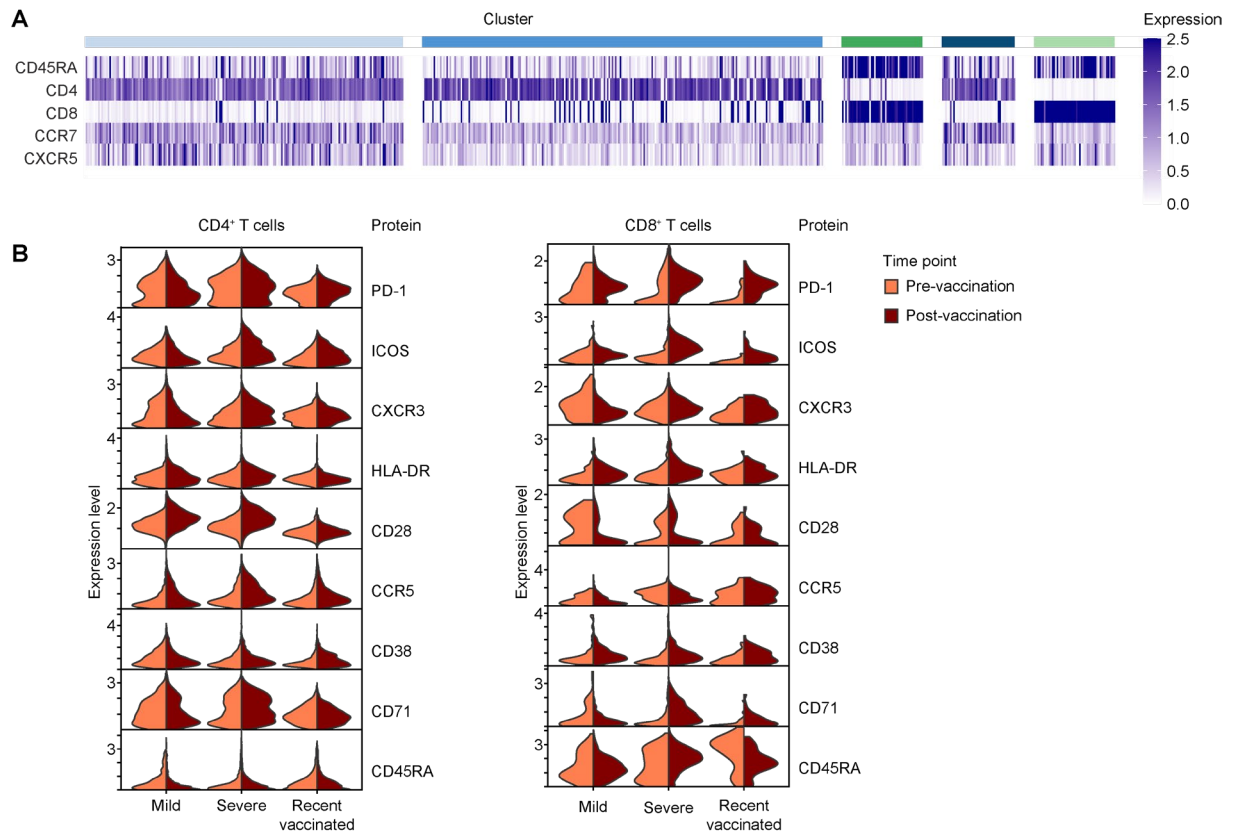

**Fig. S5. Protein expression among spike-specific T cells determined via CITE-seq. (A)** Heatmap showing protein expression measured via CITE-seq using a reduced panel for convalescent donors sampled on day 35. **(B)** Violin plots showing the expression of activation markers separated by donor group and time point.

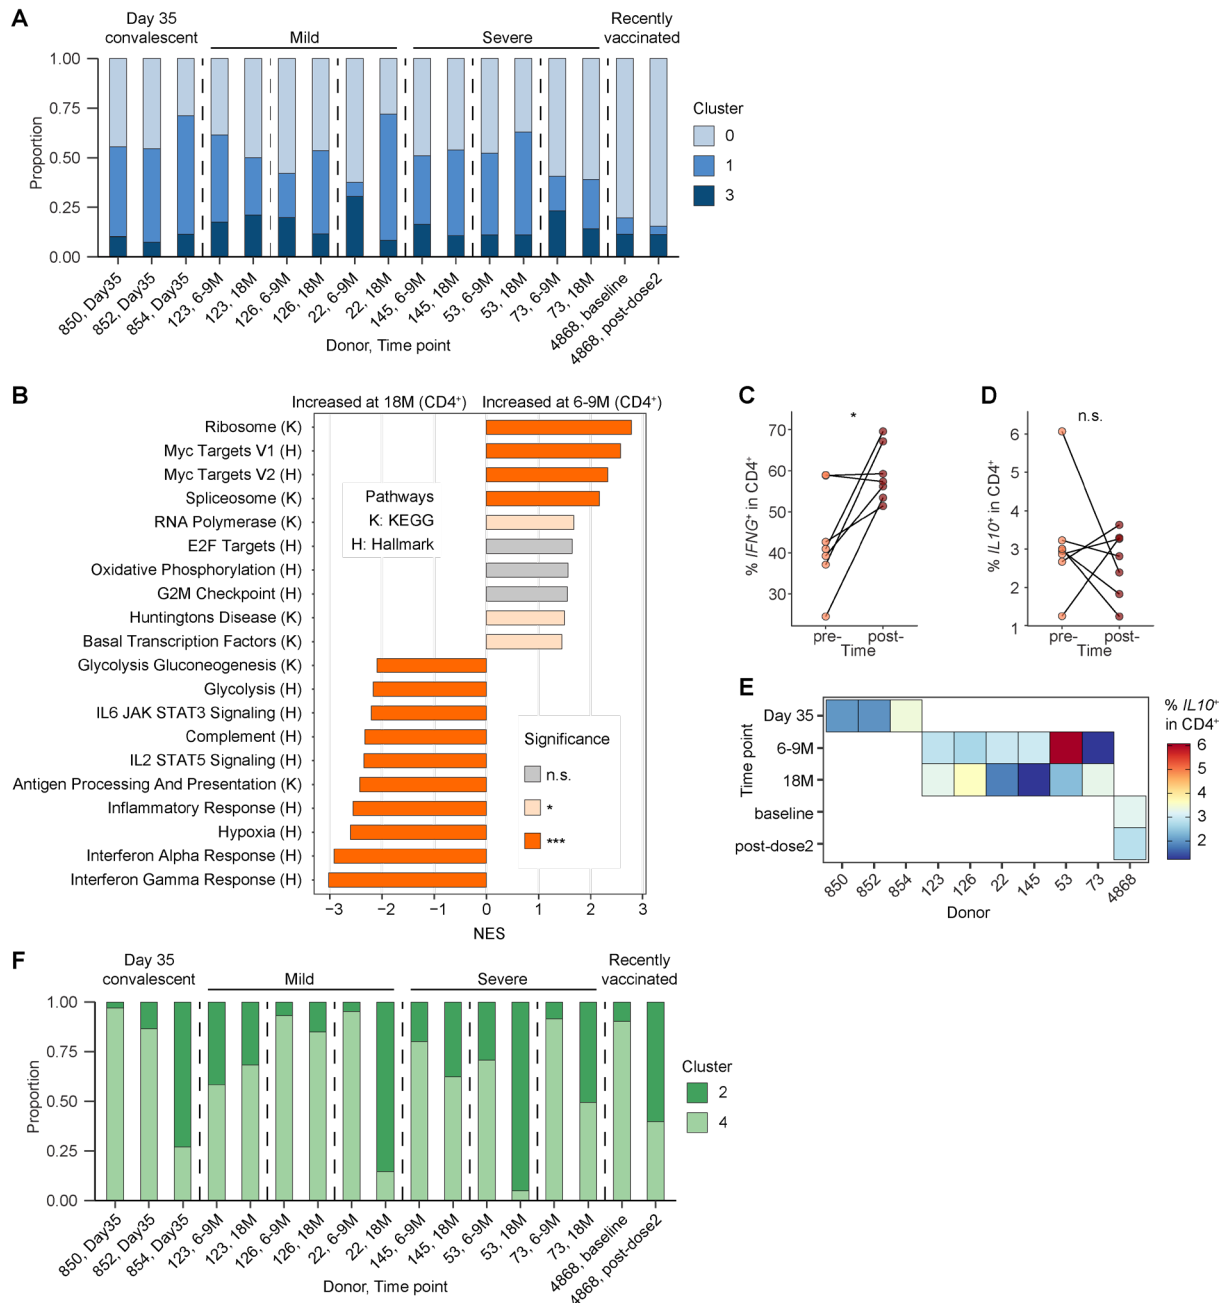

**Fig. S6. Transcriptomic comparison of spike-specific T cells before and after vaccination.** (A) Proportions of AIM<sup>+</sup> CD4<sup>+</sup> T cells from individual donors belonging to each CD4<sup>+</sup> T cell cluster. (B) GSEA summary of differentially expressed genes between CD4<sup>+</sup> T cells at 6-9M versus 18M. (C) Dot plots of the percentages of CD4<sup>+</sup> T cells from mild, severe and recently vaccinated donors with expression of *IFNG*. (D) Dot plots of the percentages of CD4<sup>+</sup> T cells from mild, severe and recently vaccinated donors with expression of *IL10*. (E) Percentages of CD4<sup>+</sup> T cells with expression of *IL10*. (F) Proportions of AIM<sup>+</sup> CD8<sup>+</sup> T cells from individual donors belonging to each CD8<sup>+</sup> T cell cluster. Statistical significance was determined by Broad GSEA test (B) and Mann–Whitney U test (C and D). Adjusted p-values calculated using the Benjamini–Hochberg (B) method. n.s. =  $P > 0.05$ , \* $P < 0.05$ , \*\* $P < 0.01$ , \*\*\* $P < 0.001$

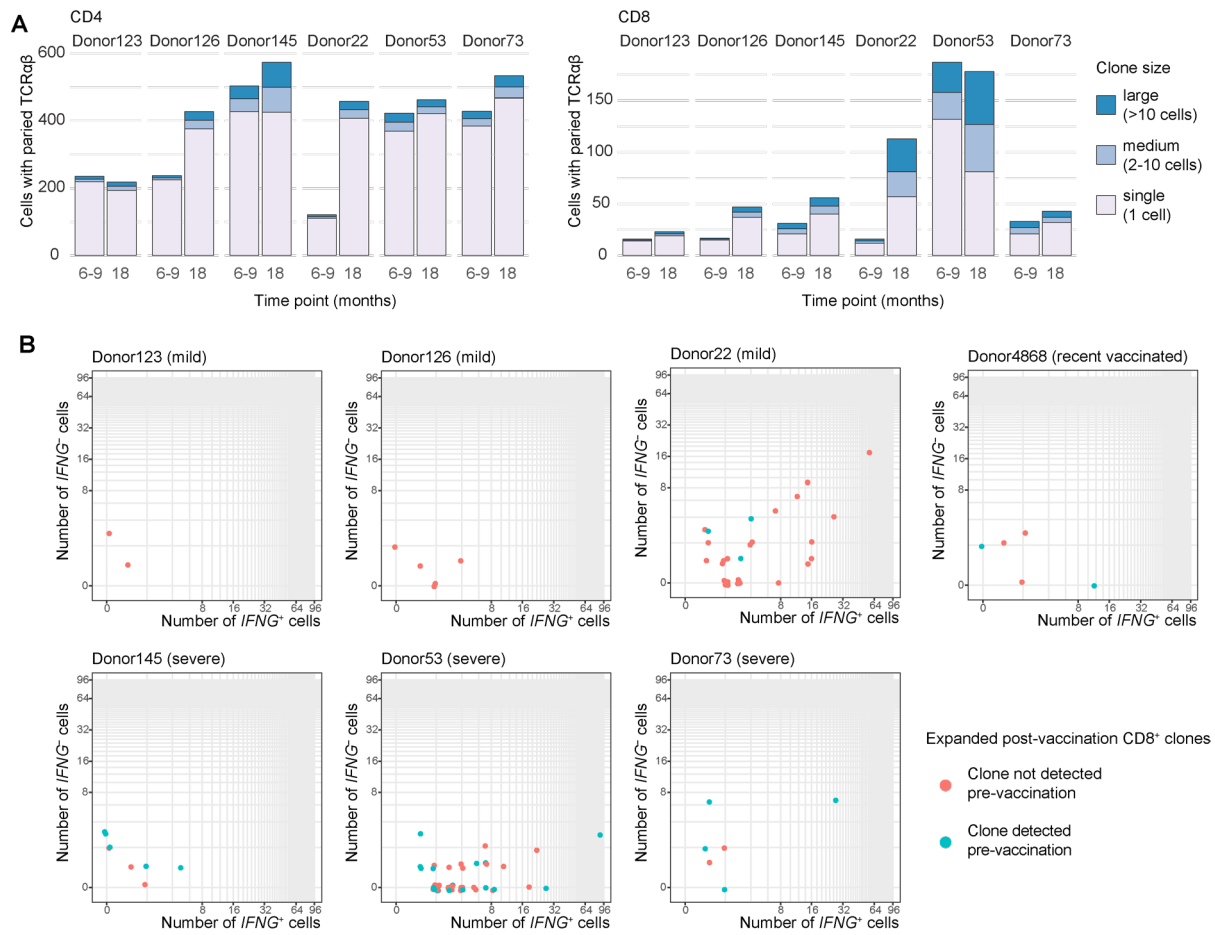

**Fig. S7. Clonal characterization of spike-specific T cells before and after vaccination.** (A) Proportions of CD4<sup>+</sup> and CD8<sup>+</sup> T cells classified by the degree of clonal expansion. (B) *IFN*γ expression among expanded CD8<sup>+</sup> T cell clonotypes after vaccination separated by donor.



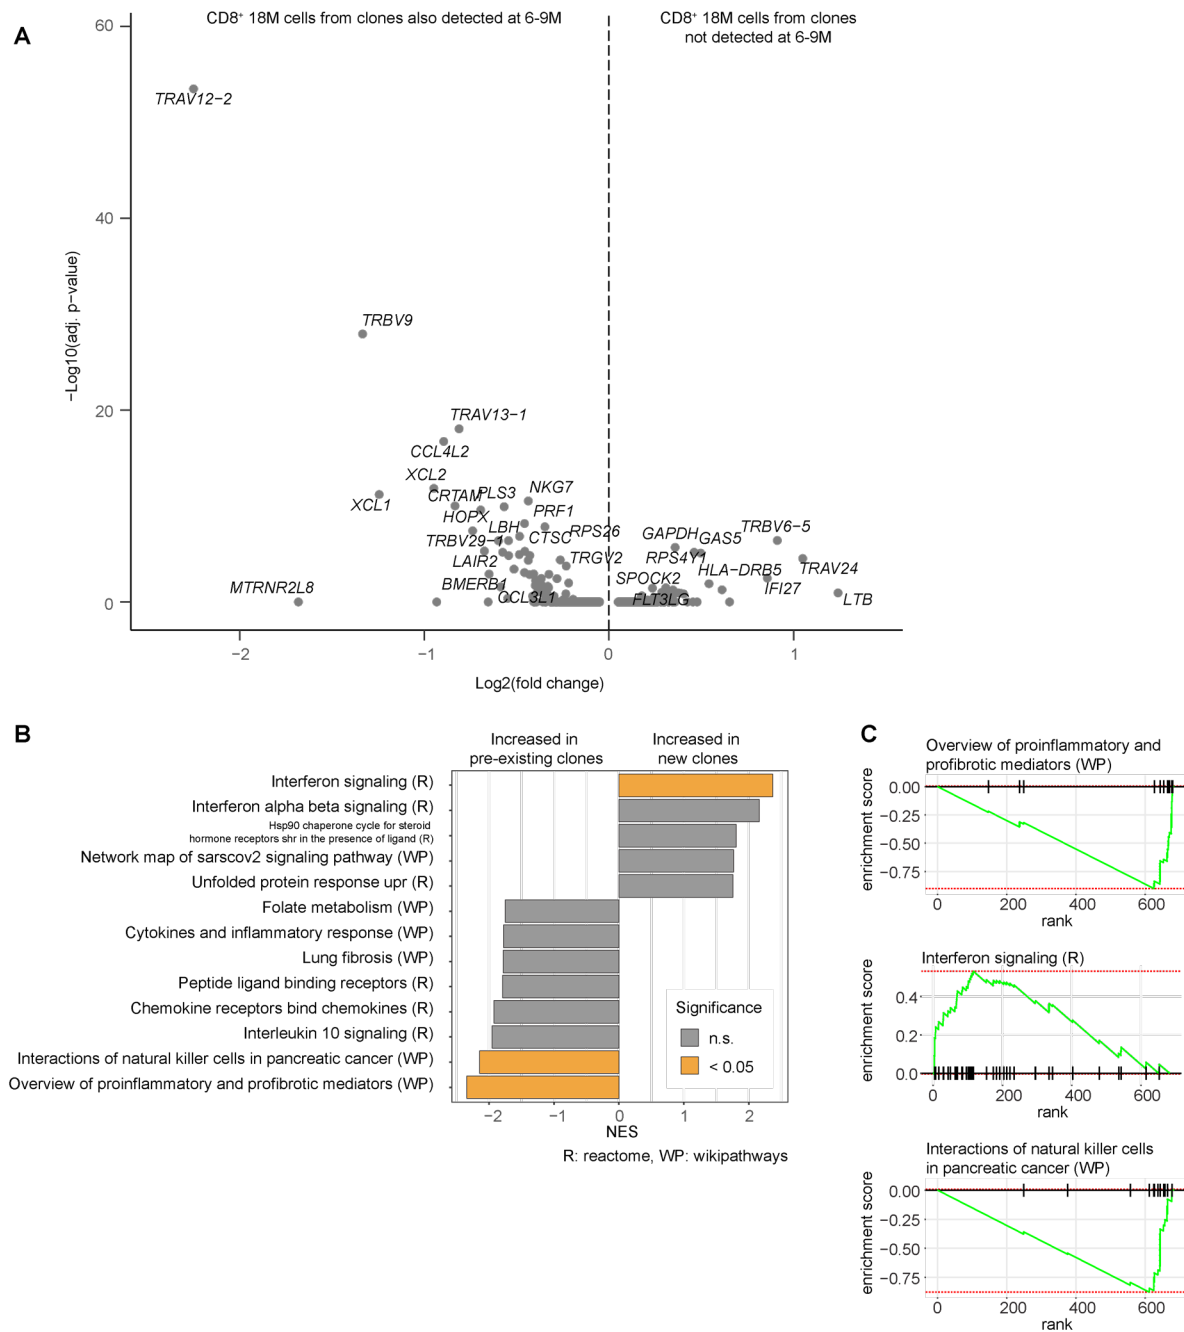

**Fig. S8. Transcriptomic signatures of CD8<sup>+</sup> T cell clonotypes detected at one or both time points.** (A) Volcano plot showing differentially expressed genes between existing and newly detected CD8<sup>+</sup> T cell clonotypes at 18M. (B) GSEA summary of differentially expressed genes between existing and newly detected CD8<sup>+</sup> T cell clonotypes at 18M. (C) GSEA plot showing significantly enriched pathways at 18M. WP: WikiPathways; R: Reactome. Statistical significance was determined by Mann–Whitney U test (A) and Broad GSEA test (C) and. Adjusted p-values calculated using the Bonferroni method (A). n.s. =  $P > 0.05$ , \* $P < 0.05$

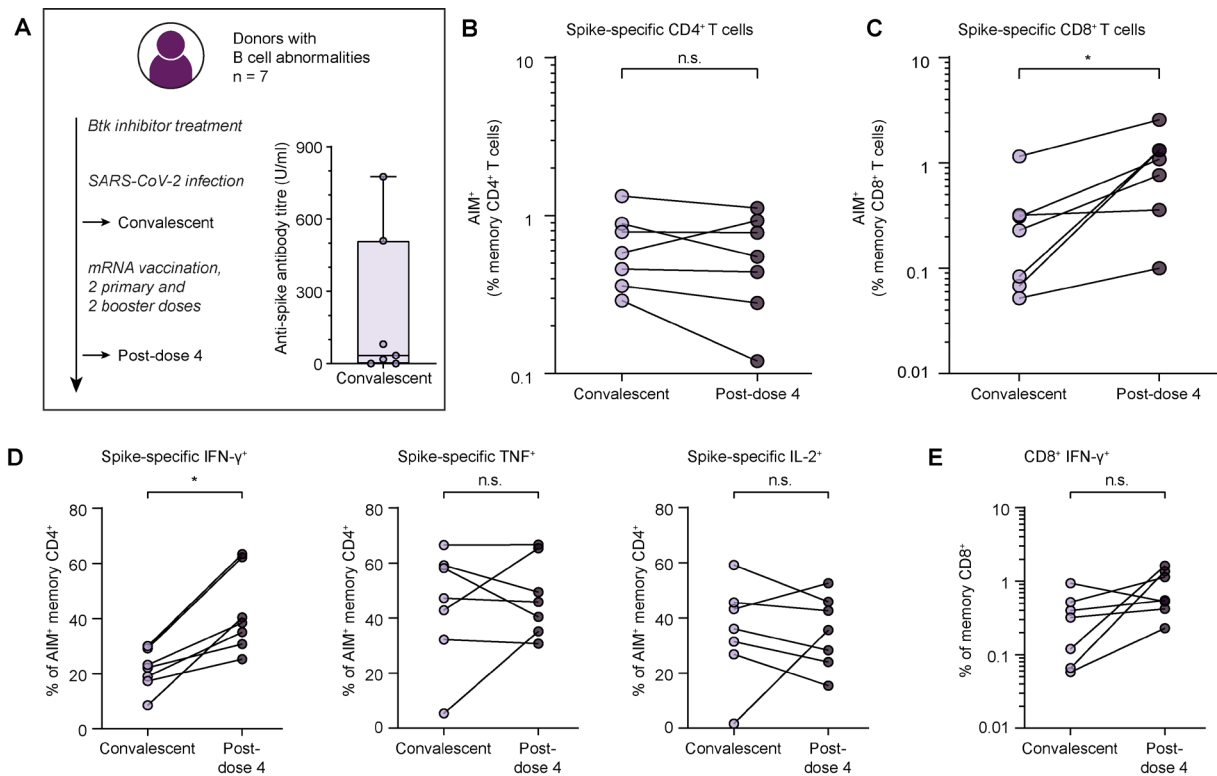

**Fig. S9. Characterization of hybrid spike-specific T cell responses in donors with CLL.** (A) Overview of donors and sampling time points from a cohort of patients undergoing treatment for CLL. (B) Frequencies of AIM<sup>+</sup> memory CD4<sup>+</sup> T cells. (C) Frequencies of AIM<sup>+</sup> memory CD8<sup>+</sup> T cells. (D) Percentages of AIM<sup>+</sup> memory CD4<sup>+</sup> T cells expressing cytokines. (E) Percentages of total memory CD8<sup>+</sup> T cells expressing IFN- $\gamma$ . Statistical significance was determined by paired Wilcoxon Signed-Rank Test (B, C, D, E). n.s. =  $P > 0.05$ , \* $P < 0.05$

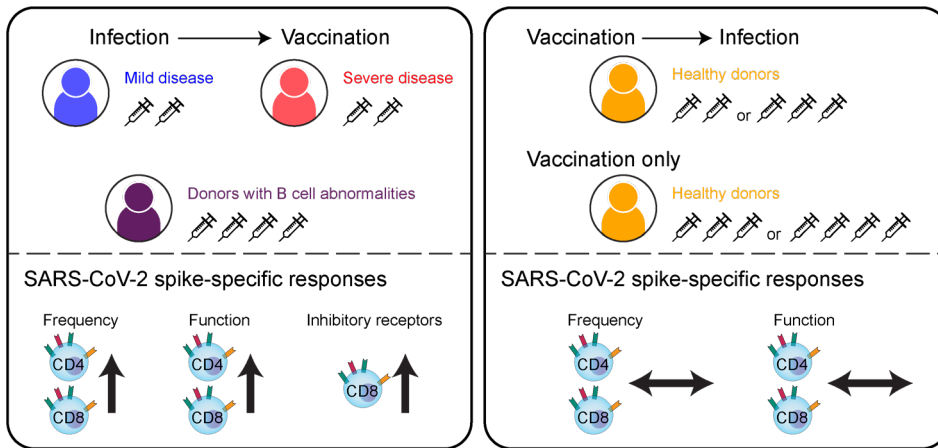

**Fig. S10. Summary of hybrid T cell immunity shaped by infection and vaccination.** Schematic representation of the key findings.

**Table S1. Summary of donors with a history of mild or severe disease.**

| <b>Donor group and time point</b> | <b>Characteristic</b>                                      | <b>Value</b>      |
|-----------------------------------|------------------------------------------------------------|-------------------|
| Mild (non-hospitalized)           | Total number                                               | 50                |
|                                   | Number with paired time points                             | 31                |
| 6–9 months convalescence          | Total number                                               | 44                |
|                                   | Unvaccinated                                               | 44                |
|                                   | Median age at infection (range)                            | 54.5 (43–78)      |
|                                   | Male / Female                                              | 33 / 11 (75/25 %) |
| 18 months convalescence           | Total number                                               | 37                |
|                                   | Unvaccinated                                               | 3                 |
|                                   | Vaccinated                                                 | 34                |
|                                   | Vaccine platform (Comirnaty, SpikeVax, Vaxzevria, unknown) | 27, 3, 2, 2       |
|                                   | Median age at infection (range)                            | 57 (43–78)        |
|                                   | Male / Female                                              | 28 / 9 (76/24 %)  |
| Severe (hospitalized)             | Total number                                               | 53                |
|                                   | Number with paired time points                             | 24                |
| 6–9 months convalescence *        | Total number                                               | 45                |
|                                   | Unvaccinated                                               | 45                |
|                                   | Median age at infection (range)                            | 57 (33–68)        |
|                                   | Male / Female *                                            | 34 / 7 (76/16 %)  |
|                                   | Admitted to ICU                                            | 26                |
|                                   | Required ventilator                                        | 21                |
| 18 months convalescence           | Total number                                               | 32                |
|                                   | Unvaccinated                                               | 7                 |
|                                   | Vaccinated                                                 | 25                |
|                                   | Vaccine platform (Comirnaty, SpikeVax, Vaxzevria, unknown) | 16, 6, 0, 3       |
|                                   | Median age at infection (range)                            | 57.5 (33–76)      |
|                                   | Male / Female                                              | 23 / 9 (72/28 %)  |
|                                   | Admitted to ICU                                            | 18                |
|                                   | Required ventilator                                        | 15                |

The exact date of infection or vaccination was unavailable for four donors with mild disease and two donors with severe disease. \*Clinical information was unavailable from four donors. ICU: intensive care unit.

**Table S2. Summary of donors selected for tetramer analysis.**

| <b>Donor group and time point</b>                                                                                                                                             | <b>Characteristic</b>           | <b>Value</b> |
|-------------------------------------------------------------------------------------------------------------------------------------------------------------------------------|---------------------------------|--------------|
| Mild (non-hospitalized) <ul style="list-style-type: none"> <li>Paired 6–9M and 18M time points for each donor</li> <li>All donors vaccinated at the 18M time point</li> </ul> | Total number                    | 14           |
|                                                                                                                                                                               | Median age at infection (range) | 54 (43–66)   |
|                                                                                                                                                                               | Male / Female                   | 10 / 4       |
|                                                                                                                                                                               | HLA combinations                |              |
|                                                                                                                                                                               | A24                             | 3            |
|                                                                                                                                                                               | A2 A24                          | 6            |
|                                                                                                                                                                               | A2 B7                           | 2            |
| A24 B7                                                                                                                                                                        | 2                               |              |
| A2 A24 B7                                                                                                                                                                     | 1                               |              |
| Severe (hospitalized) <ul style="list-style-type: none"> <li>Paired 6–9M and 18M time points for each donor</li> <li>All donors vaccinated at the 18M time point</li> </ul>   | Total number                    | 14           |
|                                                                                                                                                                               | Median age at infection (range) | 57.5 (33–68) |
|                                                                                                                                                                               | Male / Female                   | 11 / 3       |
|                                                                                                                                                                               | HLA combinations                |              |
|                                                                                                                                                                               | A2                              | 5            |
|                                                                                                                                                                               | A24                             | 5            |
|                                                                                                                                                                               | A2 A24                          | 2            |
| A2 B7                                                                                                                                                                         | 1                               |              |
| A2 A24 B7                                                                                                                                                                     | 1                               |              |

**Table S3. Summary of donors selected for single-cell RNA-sequencing (scRNA-seq).**

| <b>Donor group and time point</b>                                                                                                                                                                                                                  | <b>Characteristic</b> | <b>Value</b>  |
|----------------------------------------------------------------------------------------------------------------------------------------------------------------------------------------------------------------------------------------------------|-----------------------|---------------|
| Mild <ul style="list-style-type: none"> <li>Non-hospitalized</li> <li>6–9 months convalescence</li> <li>18 months convalescence</li> </ul>                                                                                                         | Donor IDs             | 22, 123, 126  |
|                                                                                                                                                                                                                                                    | Age                   | 67, 59, 57    |
|                                                                                                                                                                                                                                                    | Sex                   | M, M, M       |
|                                                                                                                                                                                                                                                    | Vaccine platform      |               |
|                                                                                                                                                                                                                                                    | Vaxzevria (Donor IDs) | 22            |
|                                                                                                                                                                                                                                                    | Comirnaty (Donor IDs) | 123, 126      |
| Severe <ul style="list-style-type: none"> <li>Non-hospitalized</li> <li>6–9 months convalescence</li> <li>18 months convalescence</li> </ul>                                                                                                       | Donor IDs             | 53, 73, 145   |
|                                                                                                                                                                                                                                                    | Age                   | 56, 62, 56    |
|                                                                                                                                                                                                                                                    | Sex                   | M, F, F       |
|                                                                                                                                                                                                                                                    | Vaccine platform      |               |
|                                                                                                                                                                                                                                                    | Comirnaty (Donor IDs) | 53, 73        |
|                                                                                                                                                                                                                                                    | Unknown (Donor IDs)   | 145           |
| Recently vaccinated <ul style="list-style-type: none"> <li>Non-hospitalized</li> <li>Baseline: 2 weeks before vaccination or 13 months convalescence</li> <li>Dose 2+: 2 weeks after second dose vaccination or 15 months convalescence</li> </ul> | Donor IDs             | 4868          |
|                                                                                                                                                                                                                                                    | Age                   | 54            |
|                                                                                                                                                                                                                                                    | Sex                   | F             |
|                                                                                                                                                                                                                                                    | Vaccine platform      |               |
|                                                                                                                                                                                                                                                    | SpikeVax (Donor IDs)  | 4868          |
|                                                                                                                                                                                                                                                    |                       |               |
| Recently convalescent <ul style="list-style-type: none"> <li>Non-hospitalized</li> <li>Day 35 convalescence</li> <li>Unvaccinated</li> </ul>                                                                                                       | Donor IDs             | 850, 852, 854 |
|                                                                                                                                                                                                                                                    | Unvaccinated          | 3             |
|                                                                                                                                                                                                                                                    | Age                   | Unavailable   |
|                                                                                                                                                                                                                                                    | Sex                   | F, F, M       |

**Table S4. Summary of donors with B cell abnormalities (CLL).**

| <b>Donor group and time point</b>                                                                                                                         | <b>Characteristic</b>                         | <b>Value</b>  |
|-----------------------------------------------------------------------------------------------------------------------------------------------------------|-----------------------------------------------|---------------|
| B cell abnormality <ul style="list-style-type: none"> <li>• Treated with BTK inhibition for CLL</li> <li>• Convalescent</li> <li>• Post-dose 4</li> </ul> | Total number                                  | 7             |
|                                                                                                                                                           | Median age at convalescent time point (range) | 69<br>(46–77) |
|                                                                                                                                                           | Male / Female                                 | 4 / 3         |
|                                                                                                                                                           | Hospitalized                                  | 6             |

CLL: chronic lymphocytic leukemia; BTK: Bruton's tyrosine kinase

**Table S5. Summary of healthy vaccinated donors.**

| <b>Donor group and time point</b>                                                                                                                                                                                     | <b>Characteristic</b>             | <b>Value</b>  |
|-----------------------------------------------------------------------------------------------------------------------------------------------------------------------------------------------------------------------|-----------------------------------|---------------|
| Vaccinated healthy controls <ul style="list-style-type: none"> <li>• 3 month post-vaccination follow-up (two doses received)</li> <li>• 18 month post-vaccination follow-up (three or four doses received)</li> </ul> | Total number                      | 14            |
|                                                                                                                                                                                                                       | <hr/>                             |               |
| With breakthrough infection                                                                                                                                                                                           | Total number                      | 5             |
|                                                                                                                                                                                                                       | Median age at vaccination (range) | 32<br>(26–55) |
|                                                                                                                                                                                                                       | Male / Female                     | 2 / 3         |
|                                                                                                                                                                                                                       | Vaccine platform                  |               |
|                                                                                                                                                                                                                       | Comirnaty only                    | 2             |
|                                                                                                                                                                                                                       | Comirnaty and SpikeVax            | 3             |
|                                                                                                                                                                                                                       | Clinical history                  |               |
| Two doses > breakthrough                                                                                                                                                                                              | 1                                 |               |
| Two doses > breakthrough > third dose                                                                                                                                                                                 | 1                                 |               |
| Three doses > breakthrough                                                                                                                                                                                            | 3                                 |               |
| <hr/>                                                                                                                                                                                                                 |                                   |               |
| Without breakthrough infection <ul style="list-style-type: none"> <li>• All received four vaccine doses by the 18 month follow-up</li> </ul>                                                                          | Total number                      | 9             |
|                                                                                                                                                                                                                       | Median age at vaccination (range) | 46<br>(28–59) |
|                                                                                                                                                                                                                       | Male / Female                     | 4 / 5         |
|                                                                                                                                                                                                                       | Vaccine platform                  |               |
|                                                                                                                                                                                                                       | Comirnaty only                    | 6             |
| Comirnaty and SpikeVax                                                                                                                                                                                                | 3                                 |               |

**Table S6. Surface staining protocol for flow cytometry.**

| STEP 1: Stain for viability at room temperature for 10 minutes.                                               |                       |            |           |                |        |
|---------------------------------------------------------------------------------------------------------------|-----------------------|------------|-----------|----------------|--------|
| Marker                                                                                                        | Fluorophore           | Supplier   | Dilution  | Product number | Clone  |
| LIVE/DEAD Fixable Aqua                                                                                        | For 405 nm excitation | Invitrogen | 1X in PBS | L34957         | -      |
| STEP 2: Stain for chemokine receptors at 37°C for 10 minutes.                                                 |                       |            |           |                |        |
| Marker                                                                                                        | Fluorophore           | Supplier   | Dilution  | Product number | Clone  |
| CCR7                                                                                                          | APC-Cy7               | BioLegend  | 1:50      | 353212         | G043H7 |
| CCR4                                                                                                          | BB700                 | BD         | 1:50      | 566475         | 1G1    |
| CCR6                                                                                                          | BUV737                | BD         | 1:75      | 612780         | 11A9   |
| CXCR3                                                                                                         | AF647                 | BioLegend  | 1:100     | 353712         | G025H7 |
| STEP 3: Stain with remaining antibodies at room temperature for 30 minutes in BD Brilliant Stain Buffer Plus. |                       |            |           |                |        |
| Marker                                                                                                        | Fluorophore           | Supplier   | Dilution  | Product number | Clone  |
| CD40L                                                                                                         | BV421                 | BioLegend  | 1:25      | 310824         | 24-31  |
| 4-1BB                                                                                                         | PE-Cy7                | BioLegend  | 1:25      | 309818         | 4B4-1  |
| CD4                                                                                                           | BUV496                | BD         | 1:25      | 612936         | SK3    |
| CD14                                                                                                          | BV510                 | BioLegend  | 1:100     | 301842         | M5E2   |
| CD19                                                                                                          | BV510                 | BioLegend  | 1:100     | 302242         | HIB19  |
| CD45RA                                                                                                        | BV570                 | BioLegend  | 1:200     | 304132         | HI100  |
| CD69                                                                                                          | BV650                 | BioLegend  | 1:50      | 310934         | FN50   |
| CD3                                                                                                           | BUV805                | BD         | 1:50      | 612895         | UCHT1  |
| CD8                                                                                                           | BUV395                | BD         | 1:250     | 563795         | RPA-T8 |
| STEP 4: Wash and fix cells in 1% paraformaldehyde.                                                            |                       |            |           |                |        |

**Table S7. Surface and intracellular staining protocol for flow cytometry.**

| STEP 1: Stain for chemokine receptors at 37°C for 10 minutes.                                                                                    |                       |            |          |                |             |
|--------------------------------------------------------------------------------------------------------------------------------------------------|-----------------------|------------|----------|----------------|-------------|
| Marker                                                                                                                                           | Fluorophore           | Supplier   | Dilution | Product number | Clone       |
| CCR7                                                                                                                                             | APC-Cy7               | BioLegend  | 1:50     | 353212         | G043H7      |
| CCR4                                                                                                                                             | BB700                 | BD         | 1:50     | 566475         | 1G1         |
| CCR6                                                                                                                                             | BUV737                | BD         | 1:75     | 612780         | 11A9        |
| CXCR3                                                                                                                                            | AF647                 | BioLegend  | 1:50     | 353712         | G025H7      |
| STEP 2: Stain with surface antibodies and viability dye at room temperature for 30 minutes in BD Brilliant Stain Buffer Plus.                    |                       |            |          |                |             |
| Marker                                                                                                                                           | Fluorophore           | Supplier   | Dilution | Product number | Clone       |
| PD-1                                                                                                                                             | BV711                 | BioLegend  | 1:25     | 329928         | EH12.2H7    |
| CD4                                                                                                                                              | BUV496                | BD         | 1:25     | 612936         | SK3         |
| CD14                                                                                                                                             | BV510                 | BioLegend  | 1:100    | 301842         | M5E2        |
| CD19                                                                                                                                             | BV510                 | BioLegend  | 1:100    | 302242         | HIB19       |
| CD45RA                                                                                                                                           | BV570                 | BioLegend  | 1:200    | 304132         | HI100       |
| CD8                                                                                                                                              | BUV395                | BD         | 1:250    | 563795         | RPA-T8      |
| LIVE/DEAD Fixable Aqua                                                                                                                           | For 405 nm excitation | Invitrogen | 1:1667   | L34957         | -           |
| CD38                                                                                                                                             | APC-R700              | BD         | 1:50     | 564979         | HIT2        |
| STEP 3: Fix and permeabilize with FoxP3 Transcription Factor Staining Buffer Set (Invitrogen, #00-5523-00) according to the provided protocol.   |                       |            |          |                |             |
| STEP 4: Stain with intracellular antibodies at room temperature for 30 minutes in BD Brilliant Stain Buffer Plus and 1X Permeabilization Buffer. |                       |            |          |                |             |
| Marker                                                                                                                                           | Fluorophore           | Supplier   | Dilution | Product number | Clone       |
| CD40L                                                                                                                                            | BV421                 | BioLegend  | 1:25     | 310824         | 24-31       |
| IL-17A                                                                                                                                           | eFluor660             | Invitrogen | 1:25     | 50-7178-42     | eBio64CAP17 |
| IL-2                                                                                                                                             | PE-Dazzle594          | BioLegend  | 1:33     | 500344         | MQ1-17H12   |
| 4-1BB                                                                                                                                            | PE-Cy7                | BioLegend  | 1:100    | 309818         | 4B4-1       |
| TNFa                                                                                                                                             | BV650                 | BD         | 1:166    | 563418         | MAb11       |
| CD3                                                                                                                                              | BUV805                | BD         | 1:250    | 612895         | UCHT1       |
| CD69                                                                                                                                             | BUV563                | BD         | 1:200    | 748764         | FN50        |
| IFN-γ                                                                                                                                            | PE                    | BioLegend  | 1:400    | 506507         | B27         |
| Granzyme B                                                                                                                                       | BB790                 | BD         | 1:500    | 624296         | GB11        |
| STEP 5: Wash and fix cells in 1% paraformaldehyde.                                                                                               |                       |            |          |                |             |



**Table S8. Tetramer, surface and intracellular staining protocol for flow cytometry.**

| STEP 1: Incubate with dasatinib at room temperature for 10 minutes.                                                                                                                   |                       |            |             |                |            |
|---------------------------------------------------------------------------------------------------------------------------------------------------------------------------------------|-----------------------|------------|-------------|----------------|------------|
| Reagent                                                                                                                                                                               | Fluorophore           | Supplier   | Final conc. | Product number | Clone      |
| Dasatinib                                                                                                                                                                             | -                     | STEMCELL   | 50 µM       | 73082          | -          |
| STEP 2: Incubate with one relevant PE tetramer/tetramer pool at room temperature for 20 minutes. Each tetramer should be equivalent to 0.2 µl of pMHC (0.5 µg/ml, total 10µl volume). |                       |            |             |                |            |
| Reagent                                                                                                                                                                               |                       |            | Fluorophore |                |            |
| Tetramer pool consisting of:<br>SARS-CoV-2 nucleocapsid A*0201 LLLDRLNQL<br>SARS-CoV-2 ORF3a A*0201 ALSKGVHFV<br>SARS-CoV-2 ORF3 A*0201 LLYDANYFL                                     |                       |            | PE          |                |            |
| SARS-CoV-2 nucleocapsid B*0702 SPRWYFYFL                                                                                                                                              |                       |            | PE          |                |            |
| CMV pp65 B*0702 TPRVTGGGAM                                                                                                                                                            |                       |            | PE          |                |            |
| CMV pp65 A*0201 NLVPMVATV                                                                                                                                                             |                       |            | PE          |                |            |
| STEP 3: Incubate with one relevant BV421 tetramer at room temperature for 20 minutes.                                                                                                 |                       |            |             |                |            |
| Reagent                                                                                                                                                                               |                       |            | Fluorophore |                |            |
| SARS-CoV-2 spike A*0201 YLQPRTFLL                                                                                                                                                     |                       |            | BV421       |                |            |
| SARS-CoV-2 spike A*2402 QYIKWPWYI                                                                                                                                                     |                       |            | BV421       |                |            |
| SARS-CoV-2 spike B*0702 SPRRARSVA                                                                                                                                                     |                       |            | BV421       |                |            |
| CMV pp65 A*0201 NLVPMVATV                                                                                                                                                             |                       |            | BV421       |                |            |
| STEP 4: Wash cells. Stain for viability at room temperature for 10 minutes.                                                                                                           |                       |            |             |                |            |
| Marker                                                                                                                                                                                | Fluorophore           | Supplier   | Dilution    | Product number | Clone      |
| LIVE/DEAD Fixable Aqua                                                                                                                                                                | For 405 nm excitation | Invitrogen | 1X in PBS   | L34957         | -          |
| STEP 5: Stain for chemokine receptors at 37°C for 10 minutes.                                                                                                                         |                       |            |             |                |            |
| Marker                                                                                                                                                                                | Fluorophore           | Supplier   | Dilution    | Product number | Clone      |
| CCR7                                                                                                                                                                                  | APC-Cy7               | BioLegend  | 1:50        | 353212         | G043H7     |
| CXCR3                                                                                                                                                                                 | PE-Cy5                | BioLegend  | 1:200       | 353756         | G025H7     |
| CX3CR1                                                                                                                                                                                | BUV615                | BioLegend  | 1:100       | 750690         | 2A9-1      |
| STEP 6: Stain with surface antibodies at room temperature for 30 minutes in BD Brilliant Stain Buffer Plus.                                                                           |                       |            |             |                |            |
| Marker                                                                                                                                                                                | Fluorophore           | Supplier   | Dilution    | Product number | Clone      |
| CD8                                                                                                                                                                                   | BUV396                | BioLegend  | 1:200       | 563795         | RPA-T8     |
| CD38                                                                                                                                                                                  | BUV496                | BD         | 1:200       | 612946         | HIT2       |
| LAG3                                                                                                                                                                                  | BUV661                | BD         | 1:200       | 624285         | T47-530    |
| PD-1                                                                                                                                                                                  | BUV737                | BD         | 1:50        | 612791         | EH12.1     |
| CD3                                                                                                                                                                                   | BUV805                | BD         | 1:50        | 612895         | UCHT1      |
| CD14                                                                                                                                                                                  | BV510                 | BioLegend  | 1:100       | 301842         | M5E2       |
| CD19                                                                                                                                                                                  | BV510                 | BioLegend  | 1:100       | 302242         | HIB19      |
| CD45RA                                                                                                                                                                                | BV570                 | BioLegend  | 1:200       | 304132         | HI100      |
| TIM3                                                                                                                                                                                  | BV605                 | BioLegend  | 1:100       | 502936         | 344823     |
| HLA-DR                                                                                                                                                                                | BV650                 | BD         | 1:100       | 564231         | G46-6      |
| TIGIT                                                                                                                                                                                 | PE-Dazzle594          | BioLegend  | 1:100       | 372715         | A15153G    |
| CD127                                                                                                                                                                                 | BB630                 | BD         | 1:100       | Custom         | HIL-7R-M21 |
| CD27                                                                                                                                                                                  | BV786                 | BioLegend  | 1:50        | 302832         | O323       |
| CD4                                                                                                                                                                                   | PE-Cy5.5              | Invitrogen | 1:400       | 35-0042-82     | RMA-4.5    |
| CD95                                                                                                                                                                                  | BB700                 | BioLegend  | 1:50        | 305634         | DX2        |
| CD39                                                                                                                                                                                  | BV711                 | BioLegend  | 1:100       | 328228         | A1         |
| STEP 5: Wash and fix cells in 1% paraformaldehyde.                                                                                                                                    |                       |            |             |                |            |

**Table S9. Surface and oligo-conjugated antibody staining protocol for single-cell sorting and CITE-seq.**

| STEP 1: Stain for viability at room temperature for 10 minutes.                                                                                    |                       |            |           |                |             |
|----------------------------------------------------------------------------------------------------------------------------------------------------|-----------------------|------------|-----------|----------------|-------------|
| Marker                                                                                                                                             | Fluorophore           | Supplier   | Dilution  | Product number | Clone       |
| LIVE/DEAD Fixable Aqua                                                                                                                             | For 405 nm excitation | Invitrogen | 1X in PBS | L34957         | -           |
| STEP 2: Stain for chemokine receptors at 37°C for 10 minutes.                                                                                      |                       |            |           |                |             |
| Marker                                                                                                                                             | Conjugate             | Supplier   | Dilution  | Product number | Clone       |
| CCR7                                                                                                                                               | TotalSeq-C0148        | BioLegend  | 1:300     | 353251         | G043H7      |
| CXCR5                                                                                                                                              | TotalSeq-C0144        | BioLegend  | 1:500     | 356939         | J252D4      |
| CXCR3                                                                                                                                              | TotalSeq-C0140        | BioLegend  | 1:500     | 353747         | G025H7      |
| CX3CR1                                                                                                                                             | TotalSeq-C0179        | BioLegend  | 1:500     | 355705         | K0124E1     |
| CCR4                                                                                                                                               | TotalSeq-C0071        | BioLegend  | 1:500     | 359425         | L291H4      |
| CCR5                                                                                                                                               | TotalSeq-C0141        | BioLegend  | 1:500     | 359137         | J418F1      |
| CCR6                                                                                                                                               | TotalSeq-C0143        | BioLegend  | 1:500     | 353440         | G034E3      |
| CXCR6                                                                                                                                              | TotalSeq-C0804        | BioLegend  | 1:500     | 356023         | K041E5      |
| STEP 3: Stain with remaining antibodies at room temperature for 30 minutes in BD Brilliant Stain Buffer Plus. Use one hashing antibody per sample. |                       |            |           |                |             |
| Marker                                                                                                                                             | Fluorophore           | Supplier   | Dilution  | Product number | Clone       |
| CD40L                                                                                                                                              | BV421                 | BioLegend  | 1:25      | 310824         | 24-31       |
| 4-1BB                                                                                                                                              | PE-Cy7                | BioLegend  | 1:25      | 309818         | 4B4-1       |
| CD4                                                                                                                                                | FITC                  | BD         | 1:25      | 345768         | SK3         |
| CD14                                                                                                                                               | BV510                 | BioLegend  | 1:100     | 301842         | M5E2        |
| CD19                                                                                                                                               | BV510                 | BioLegend  | 1:100     | 302242         | HIB19       |
| CD69                                                                                                                                               | BV650                 | BioLegend  | 1:50      | 310934         | FN50        |
| CD8                                                                                                                                                | BV711                 | BioLegend  | 1:50      | 301044         | RPA-T8      |
| Marker                                                                                                                                             | Conjugate             | Supplier   | Dilution  | Product number | Clone       |
| CD4                                                                                                                                                | TotalSeq-C0072        | BioLegend  | 1:1250    | 300567         | RPA-T4      |
| CD8                                                                                                                                                | TotalSeq-C0046        | BioLegend  | 1:10000   | 344753         | SK1         |
| CD45RA                                                                                                                                             | TotalSeq-C0063        | BioLegend  | 1:4000    | 304163         | HI100       |
| CD127                                                                                                                                              | TotalSeq-C0390        | BioLegend  | 1:333     | 351356         | A019D5      |
| CD27                                                                                                                                               | TotalSeq-C0154        | BioLegend  | 1:500     | 302853         | O323        |
| PD-1                                                                                                                                               | TotalSeq-C0088        | BioLegend  | 1:500     | 329963         | EH12.2H7    |
| ICOS                                                                                                                                               | TotalSeq-C0171        | BioLegend  | 1:500     | 313553         | C398.4A     |
| HLA-DR                                                                                                                                             | TotalSeq-C0159        | BioLegend  | 1:500     | 307663         | L243        |
| CD122                                                                                                                                              | TotalSeq-C0246        | BioLegend  | 1:500     | 339021         | TU27        |
| CD28                                                                                                                                               | TotalSeq-C0386        | BioLegend  | 1:500     | 302963         | CD28.2      |
| CD95                                                                                                                                               | TotalSeq-C0156        | BioLegend  | 1:500     | 305651         | DX2         |
| CD38                                                                                                                                               | TotalSeq-C0389        | BioLegend  | 1:500     | 303543         | HIT2        |
| CD71                                                                                                                                               | TotalSeq-C0394        | BioLegend  | 1:500     | 334125         | CY1G4       |
| Hashtag                                                                                                                                            | Conjugate             | Supplier   | Dilution  | Product number | Clone       |
| Hashtag 1                                                                                                                                          | TotalSeq-C0251        | BioLegend  | 1:100     | 394661         | LNH-94; 2M2 |
| Hashtag 2                                                                                                                                          | TotalSeq-C0252        | BioLegend  | 1:100     | 394663         | LNH-94; 2M2 |
| Hashtag 3                                                                                                                                          | TotalSeq-C0253        | BioLegend  | 1:100     | 394665         | LNH-94; 2M2 |
| Hashtag 4                                                                                                                                          | TotalSeq-C0254        | BioLegend  | 1:100     | 394667         | LNH-94; 2M2 |
